# Supplementary material for: Fire as a Factor in the Dynamics of Meadow Vegetation: A Model Experiment in Western Siberia
Source: MDPI journal article supplement (doi:10.3390/fire7040115), 2024-04-02
Supplement: s1 [file s1]

### Supplementary materials. Satellite images of BEC territory in 2007-2022 with comments

All images were taken from Google Earth (<https://earth.google.com/>)

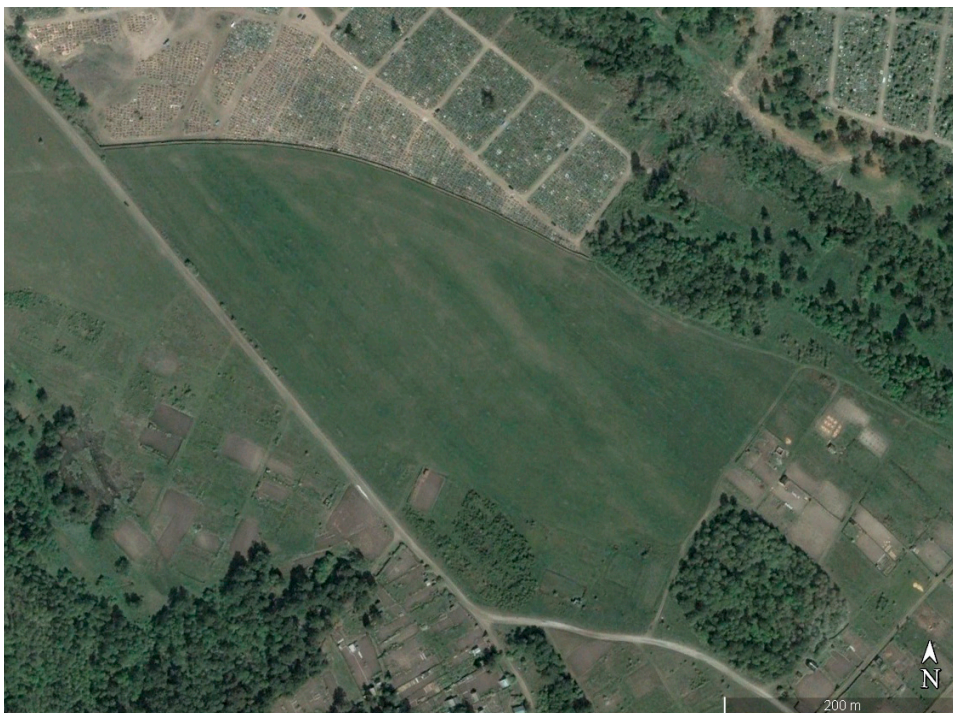

August 2006. State of territory before BEC construction. The territory of the future BEC is occupied by hayfield and partly by private allotments (in the southern part). The adjacent territories are occupied by private allotments (south and east), hayfields (west) and Baktin cemetery (north)

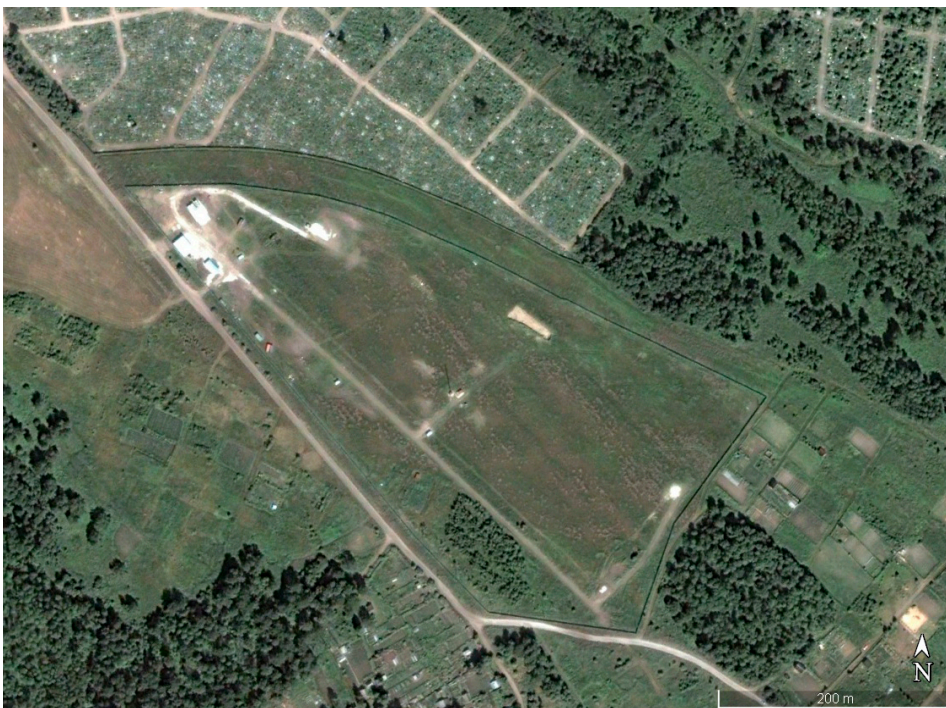

July 2008. Construction of BEC. The territory of the BEC is surrounded by a fence, the main buildings and roads are laid.



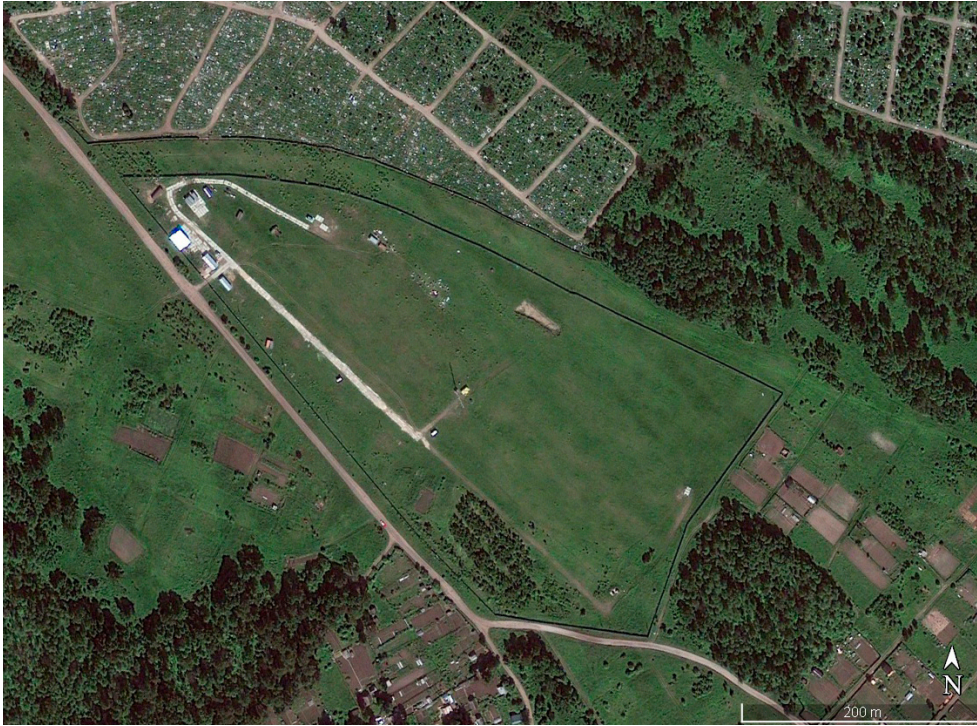

June 2010. Construction of BEC is finished.

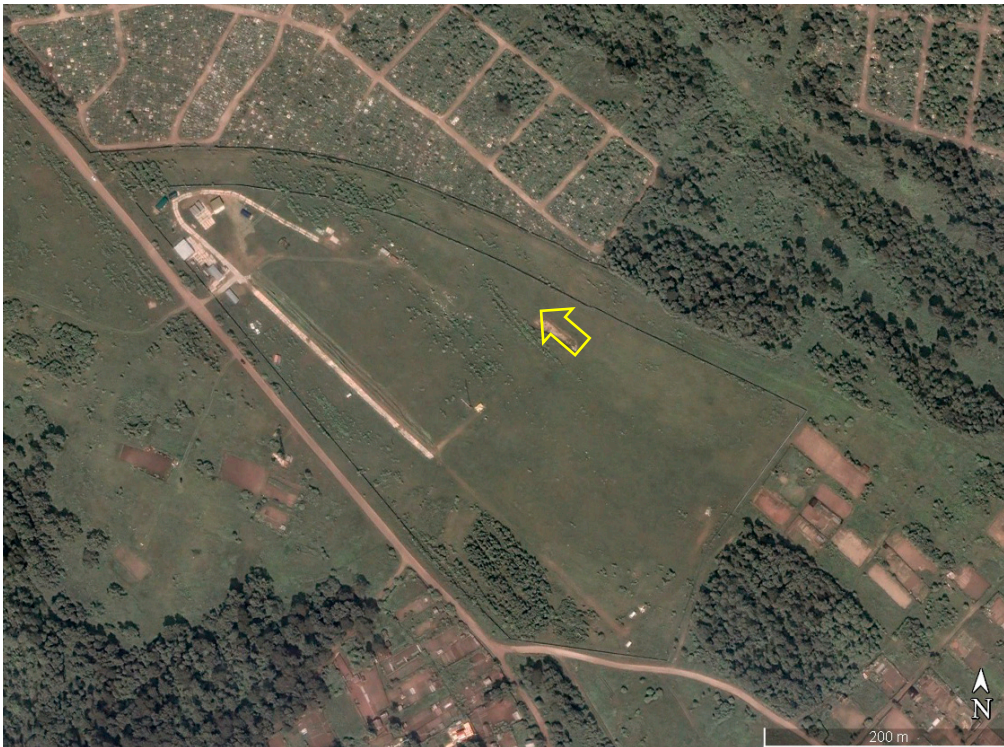

June 2012. State of vegetation on BEC in second season after 2011 burning. Location of test site is marked with arrow; the boundaries of burned area are indistinguishable.



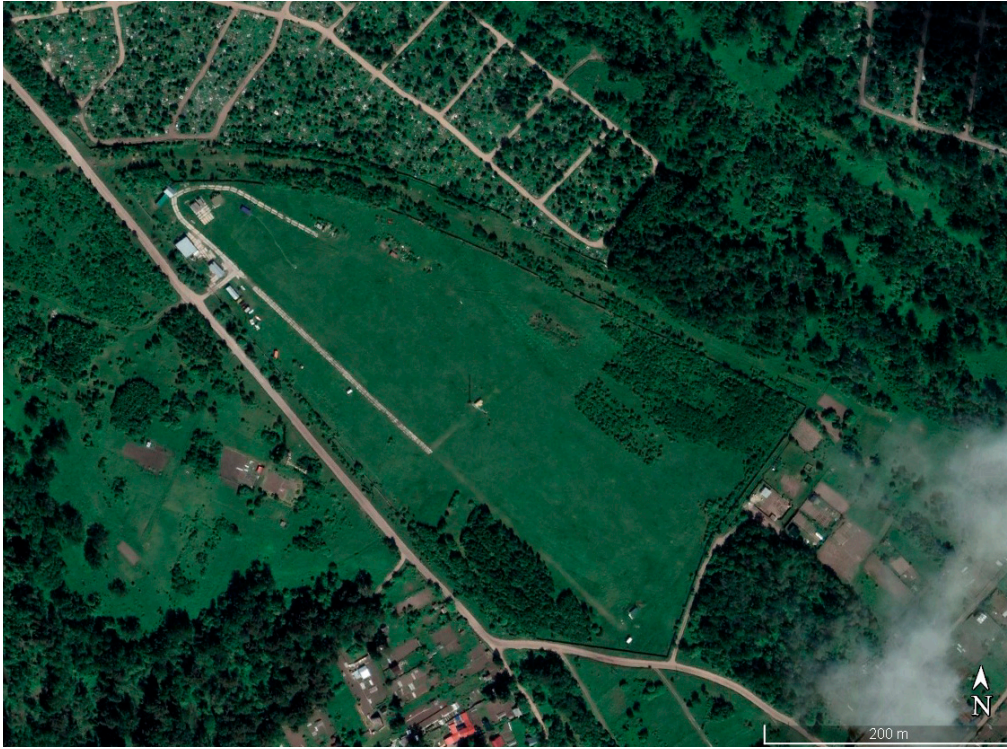

June 2018. State of vegetation of BEC before 2019 test burning.

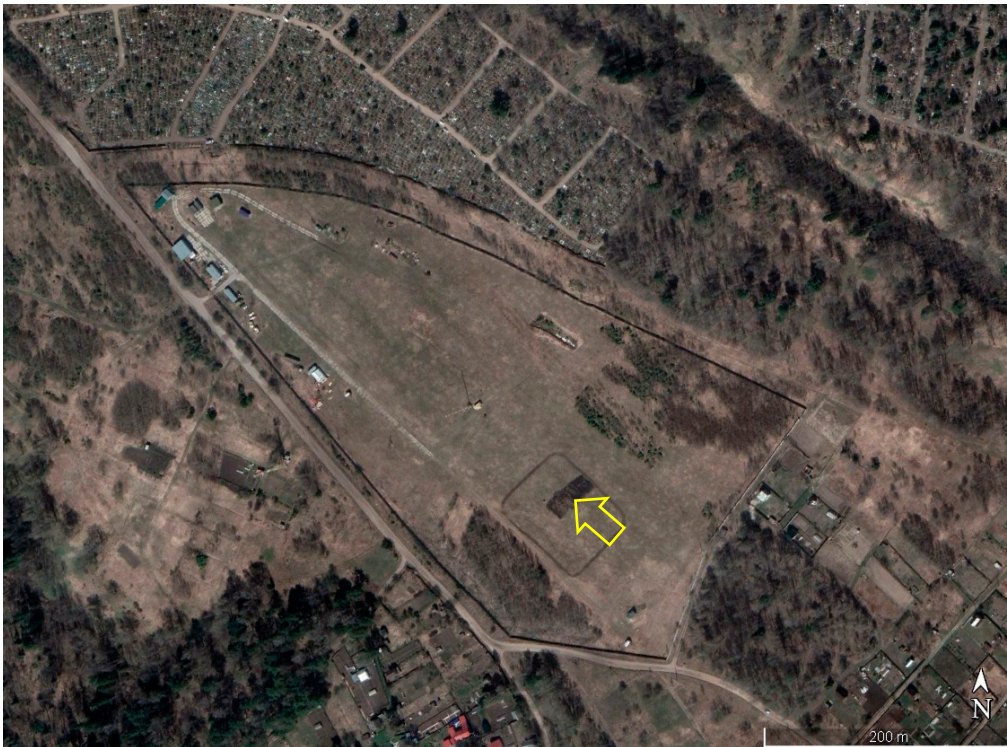

May 2019. State of vegetation on BEC in a week after 2019 test burning. Site is marked with arrow, the boundaries of the burned area are clearly visible. The rounded rectangle line around the test site is a fire protection strip and the border of the territory where mowing will be excluded this year.



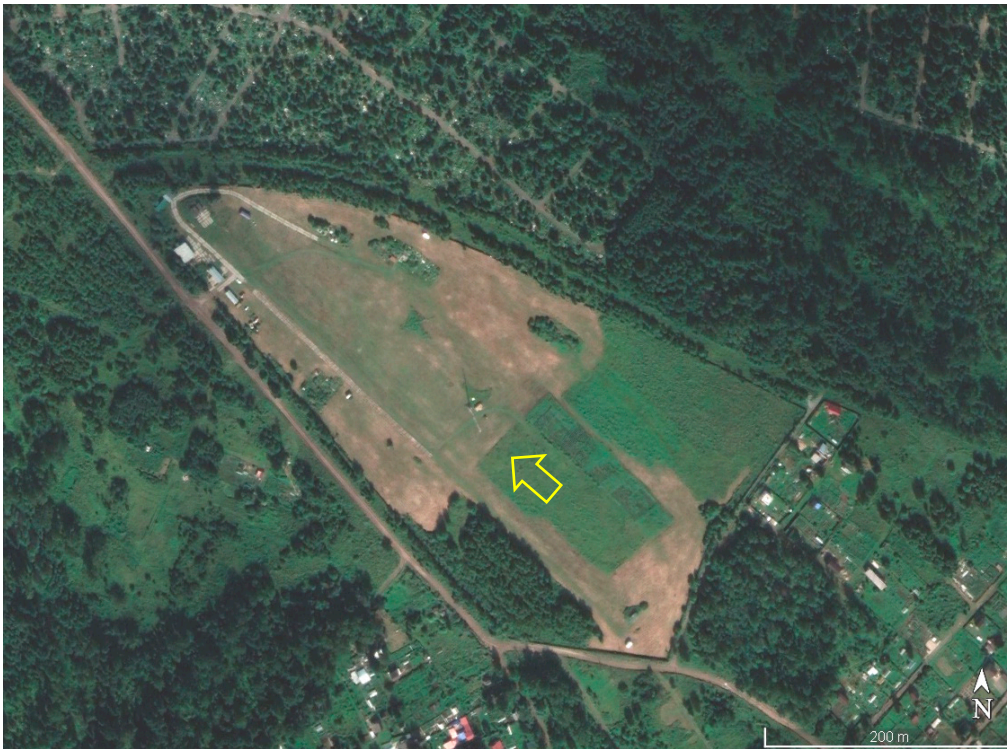

August 2021. State of vegetation on BEC after seasonal mowing. Unmowed territory (green) are clearly visible. Location of 2021 burning site is marked with arrow; the boundaries of burned area are indistinguishable.

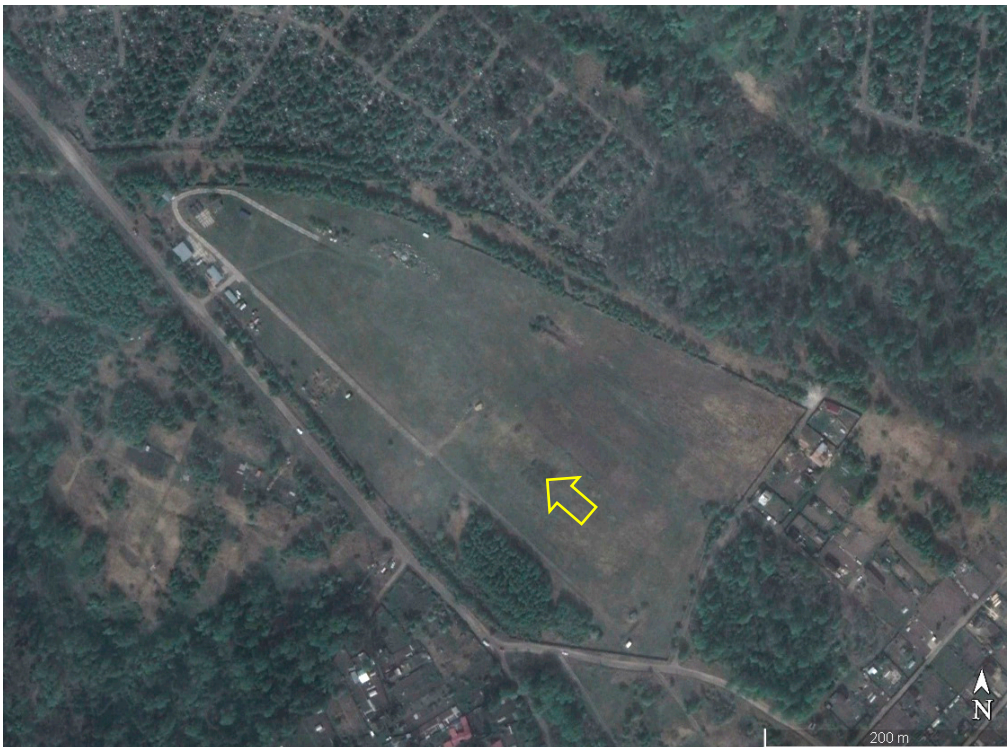

May 2022. State of vegetation on BEC in three weeks after 2022 test burning. Site is marked with arrow, the boundaries of the burned area are clearly visible.

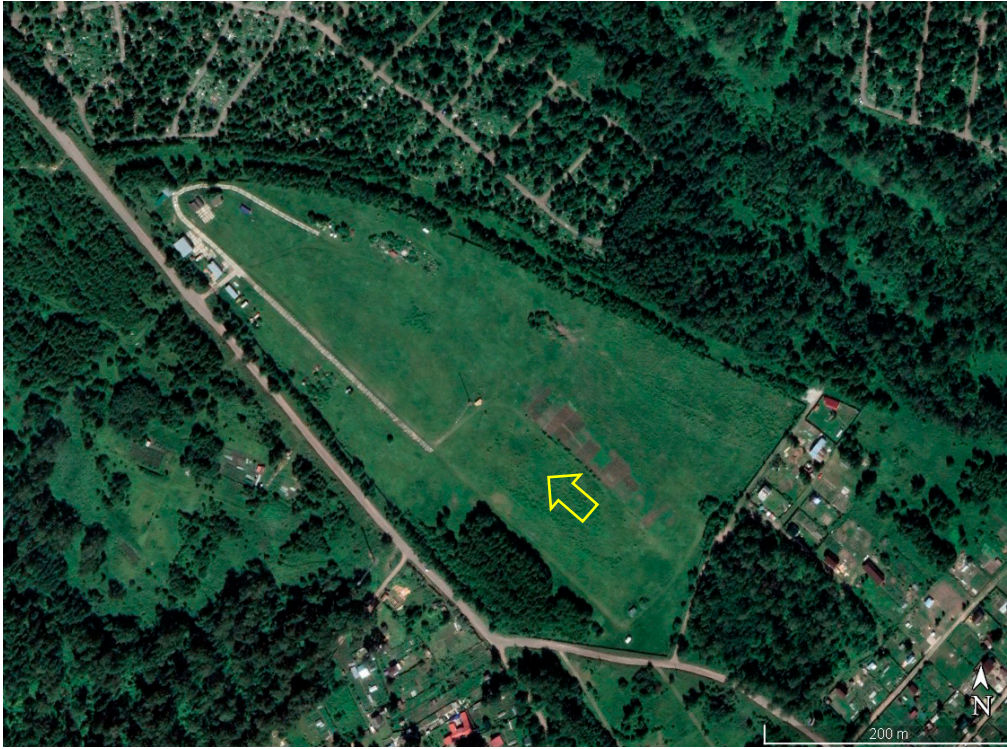

July 2022. State of vegetation on BEC in two months after 2022 test burning. Site is marked with arrow, the boundaries of the burned area are indistinguishable.
